# Supplementary material
Source: Frontiers journal article supplement (https://www.frontiersin.org/articles/524292)
Supplement: Table_1.XLSX [file Table_1.XLSX]

## Sheet: A1. Volcanoes
T1: Summary table containing each of the 162 volcanoes used in the analyses, the corresponding volcanic record, results of the Bayesian Hierarchical analysis and corresponding tectonic and crustal parameters.
Volcano details									Number of recorded eruptions2					Hierarchical Bayesian Model Results3					Tectonic setting4
Name	Region2	Subregion2	Arc (this study)	Latitude	Longitude	Oldest recorded eruption	Crustal Thickness (Z)1		Magnitude 4	Magnitude 5	Magnitude 6	Magnitude 7		Pr(M4)	Pr(M5)	Pr(M6)	Pr(M7)		Arc segment name	Age	Normal component of subduction	Parallel component of subduction	Convergence Obliquity	Normal component of convergence	Upper Plate Tectonic Stress	Thermal parameter
				(°)	(°)	(yrs)	(km)													(Ma)	(mm/yr)	(mm/yr)	(°)	(mm/yr)
Liamuiga	16	98	Antilles	17.3667	-62.8	4470	19.41		2	0	0	0		0.725581	0.180853	0.0758801	0.0176868		ANTI3	84	6	9	56	6	E1	395
Pelée	16	98	Antilles	14.8167	-61.1667	10160	20.41		21	0	0	0		0.928349	0.0468008	0.0189531	0.00589763		ANTI1	98	11	2	12	11	E1	788
Quill, The	16	98	Antilles	17.4778	-62.9597	8968	19.41		1	0	0	0		0.681721	0.206168	0.088308	0.0238025		ANTI3	84	6	9	56	6	E1	395
Soufrière Guadeloupe	16	98	Antilles	16.05	-61.6667	140000	24.07		2	0	0	0		0.71901	0.178168	0.0843183	0.0185043		ANTI2	90	9	6	31	9	E1	652
Aguilera	15	97	Austral-Andes	-50.3333	-73.75	3200	37		0	1	0	0		0.500614	0.388116	0.084025	0.0272448		PAT1	18	19	4	13	19	0	NA
Burney, Monte	15	97	Austral-Andes	-52.3333	-73.4	9400	31		0	2	0	0		0.413903	0.492871	0.076535	0.0166911		PAT2	20	18	1	4	18	0	NA
Crater Lake	12	69	Cascades	42.9333	-122.117	85000	39.89		0	1	1	0		0.401874	0.341532	0.236923	0.0196717		CASC5	10	19	11	29	19	E1	NA
Glacier Peak	12	68	Cascades	48.1117	-121.113	14484	37.12		1	0	0	0		0.670972	0.214133	0.0893466	0.0255484		CASC3	11	31	8	14	32	0	127
Meager	12	67	Cascades	50.6333	-123.5	2360	37.2		0	1	0	0		0.479206	0.410666	0.0919332	0.0181947		CASC2	10	37	5	8	39	0	163
Newberry	12	69	Cascades	43.7222	-121.229	400000	39.94		2	0	0	0		0.71482	0.18293	0.0811136	0.0211364		CASC4	11	24	10	22	24	E1	113
Rainier	12	68	Cascades	46.8528	-121.76	380000	43.92		1	0	0	0		0.668853	0.214524	0.098191	0.018432		CASC3	11	31	8	14	32	0	127
Shasta	12	70	Cascades	41.4089	-122.193	10954	35.45		0	1	0	0		0.492138	0.394989	0.0940385	0.0188346		CASC5	10	19	11	29	19	E1	NA
St. Helens	12	68	Cascades	46.2	-122.183	300000	43.51		3	4	1	0		0.461391	0.408594	0.12042	0.00959521		CASC3	11	31	8	14	32	0	127
Three Sisters	12	69	Cascades	44.1667	-121.767	2094	41		1	0	0	0		0.666889	0.221482	0.0893978	0.0222312		CASC4	11	24	10	22	24	E1	113
Kanaga	11	62	Central-Aleutians	51.9228	-177.168	6975	19.38		3	0	0	0		0.774605	0.143612	0.0651411	0.0166421		C_ALE4	58	61	37	31	61	0	2745
Seguam	11	62	Central-Aleutians	52.3153	-172.51	9250	24.35		1	0	0	0		0.666442	0.221829	0.0872746	0.0244544		C_ALE6	63	59	36	31	59	0	2904
Semisopochnoi	11	62	Central-Aleutians	51.9333	179.583	9950	18.82		0	0	0	1		0.468902	0.230111	0.0878859	0.213101		C_ALE2	56	42	58	54	42	C1	1805
Almolonga	14	85	Central-America	14.8167	-91.4833	1150	18.43		1	0	0	0		0.6648	0.218618	0.0927195	0.0238631		COST2	22	68	0	0	68	0	987
Apoyeque	14	87	Central-America	12.2417	-86.3417	20455	29.22		1	2	1	0		0.433252	0.372969	0.175692	0.0180873		COST4	28	78	7	5	78	0	1621
Arenal	14	88	Central-America	10.4633	-84.7033	7010	40.31		18	1	0	0		0.887221	0.0885181	0.020094	0.00416688		COST5	26	83	1	1	83	C1	1474
Barva	14	88	Central-America	10.135	-84.1	322000	40.31		1	0	0	0		0.672179	0.20851	0.0962569	0.0230543		COST5	26	83	1	1	83	C1	1474
Concepción	14	87	Central-America	11.5378	-85.6225	19000	36.33		1	0	0	0		0.670617	0.210132	0.0953838	0.0238674		COST5	26	83	1	1	83	C1	1474
Cosigüina	14	87	Central-America	12.9833	-87.5667	22000	25.41		0	1	0	0		0.478209	0.405407	0.0913457	0.0250388		COST4	28	78	7	5	78	0	1621
Ilopango	14	86	Central-America	13.6717	-89.0533	36000	20.5		0	0	1	0		0.477476	0.213681	0.288506	0.0203366		COST3	24	73	6	5	73	0	1255
Masaya	14	87	Central-America	11.9842	-86.1608	1575000	27.23		0	2	1	0		0.354445	0.437797	0.191579	0.0161789		COST4	28	78	7	5	78	0	1621
Momotombo	14	87	Central-America	12.4225	-86.54	2852	29.22		2	0	0	0		0.739808	0.169868	0.076726	0.0135978		COST4	28	78	7	5	78	0	1621
Rincón de la Vieja	14	88	Central-America	10.83	-85.3239	1470000	35.59		1	0	0	0		0.67276	0.209544	0.0938023	0.0238931		COST5	26	83	1	1	83	C1	1474
San Salvador	14	86	Central-America	13.7342	-89.2939	750	20.5		1	0	0	0		0.655279	0.223553	0.0954493	0.0257185		COST3	24	73	6	5	73	0	1255
Tacaná	14	84	Central-America	15.13	-92.1125	1000000	19.34		1	0	0	0		0.674301	0.214706	0.0944736	0.0165199		COST2	22	68	0	0	68	0	987
Turrialba	14	88	Central-America	10.025	-83.7669	1910	35.01		1	0	0	0		0.682933	0.19839	0.0995225	0.0191542		COST5	26	83	1	1	83	C1	1474
Láscar	15	94	Central-Andes	-23.3667	-67.7333	30000	57.25		2	0	0	0		0.718422	0.186549	0.082097	0.0129319		NCHI4	54	71	22	17	75	C3	2176
Misti, El	15	93	Central-Andes	-16.2944	-71.4089	50000	42.5		0	1	0	0		0.46627	0.412563	0.0982439	0.0229233		NCHI2	54	63	24	21	73	C3	2036
Ojos del Salado, Nevados	15	94	Central-Andes	-27.1167	-68.55	1200	61		1	0	0	0		0.660026	0.221347	0.0924532	0.0261734		NCHI6	52	68	29	23	73	C3	1910
Ubinas	15	93	Central-Andes	-16.355	-70.9031	376000	65		2	1	0	0		0.615447	0.29772	0.070749	0.016084		NCHI2	54	63	24	21	73	C3	2036
Yucamane	15	93	Central-Andes	-17.1833	-70.2	3398	47.76		0	1	0	0		0.489006	0.415424	0.0758052	0.019765		NCHI2	54	63	24	21	73	C3	2036
Chichón, El	14	84	Chiapanecan	17.36	-93.2278	3980	43.01		1	4	0	0		0.372667	0.563833	0.0510027	0.0124973		COST1	18	63	5	5	63	E1	692
Hayes	11	64	Eastern-Alaska	61.6403	-152.411	3500	28.51		0	1	0	0		0.469208	0.425282	0.0828955	0.0226154		E_ALA1	46	56	7	7	56	C1	1267
Iliamna	11	64	Eastern-Alaska	60.0319	-153.09	7840	36.89		2	0	0	0		0.722562	0.185957	0.0732119	0.0182691		E_ALA1	46	56	7	7	56	C1	1267
Akutan	11	62	Eastern-Aleutians	54.1344	-165.986	5450	28.38		0	1	1	0		0.411614	0.337426	0.232918	0.0180418		E_ALE4	58	64	12	11	64	E1	2509
Fisher	11	62	Eastern-Aleutians	54.65	-164.433	10040	30		0	0	2	0		0.412208	0.181102	0.38906	0.0176301		E_ALE5	53	62	12	11	62	0	1159
Makushin	11	62	Eastern-Aleutians	53.8908	-166.923	8809	28.24		1	0	1	0		0.563556	0.18847	0.228227	0.0197466		E_ALE3	59	65	14	12	65	E1	2813
Okmok	11	62	Eastern-Aleutians	53.4333	-168.133	9226	25.28		1	0	2	0		0.495343	0.15173	0.33446	0.018467		E_ALE3	59	65	14	12	65	E1	2813
Roundtop	11	62	Eastern-Aleutians	54.8	-163.589	9550	26		0	1	0	0		0.495704	0.383348	0.0944129	0.0265343		E_ALE5	53	62	12	11	62	0	1159
Akan	8	53	Hoikkaido-Kuriles	43.3842	144.013	1400000	29		2	0	0	0		0.73343	0.175715	0.0765949	0.0142595		SKOUR5	128	77	29	21	77	C1	4911
Lvinaya Past	9	54	Hoikkaido-Kuriles	44.6083	146.994	10650	21.96		0	0	0	1		0.473083	0.223602	0.0917272	0.211588		SKOUR3	118	76	26	19	76	C1	5502
Mashu	8	53	Hoikkaido-Kuriles	43.5697	144.565	13850	29		3	1	1	0		0.599655	0.228432	0.159209	0.0127048		SKOUR5	128	77	29	21	77	C1	4911
Rausudake	8	53	Hoikkaido-Kuriles	44.0733	145.126	1400	29.12		1	0	0	0		0.665118	0.217792	0.0954031	0.0216862		SKOUR5	128	77	29	21	77	C1	4911
Tokachidake	8	53	Hoikkaido-Kuriles	43.4156	142.69	1251000	32		2	1	0	0		0.614745	0.296257	0.0712395	0.0177581		SKOUR5	128	77	29	21	77	C1	4911
Asamayama	8	51	Honshu	36.4033	138.526	92200	30.72		9	1	0	0		0.807591	0.150255	0.0331911	0.00896317		JAP4	127	93	2	1	101	C3	5891
Hakusan	8	51	Honshu	36.1519	136.774	2150	33.9		1	0	0	0		0.667701	0.20776	0.102318	0.0222211		JAP4	127	93	2	1	101	C3	5891
Harunasan	8	51	Honshu	36.4739	138.881	1110000	30.72		2	0	0	0		0.72245	0.183533	0.0747607	0.0192564		JAP4	127	93	2	1	101	C3	5891
Kusatsu-Shiranesan	8	51	Honshu	36.6197	138.535	440000	30.72		1	0	0	0		0.673367	0.206263	0.0987761	0.0215939		JAP4	127	93	2	1	101	C3	5891
Myokosan	8	51	Honshu	36.8883	138.117	47000	30.72		2	0	0	0		0.714611	0.187815	0.0779571	0.0196165		JAP4	127	93	2	1	101	C3	5891
Niigata-Yakeyama	8	51	Honshu	36.9178	138.039	1063	30.72		1	0	0	0		0.660065	0.209505	0.107147	0.0232829		JAP4	127	93	2	1	101	C3	5891
Norikuradake	8	51	Honshu	36.1033	137.557	17960	32.42		1	0	0	0		0.667374	0.226394	0.0869556	0.0192768		JAP4	127	93	2	1	101	C3	5891
Numazawa	8	51	Honshu	37.4503	139.579	129000	29.53		0	1	0	0		0.478785	0.407647	0.0930478	0.0205201		JAP4	127	93	2	1	101	C3	5891
Takaharayama	8	51	Honshu	36.8969	139.78	345300	31.43		1	0	0	0		0.662491	0.220304	0.0923143	0.0248913		JAP4	127	93	2	1	101	C3	5891
Yakedake	8	51	Honshu	36.2236	137.59	2300	32.42		1	0	0	0		0.670602	0.21886	0.0880189	0.0225184		JAP4	127	93	2	1	101	C3	5891
Aogashima	8	52	Izu-Bonin	32.4542	139.762	3750	19.01		1	2	0	0		0.492841	0.426552	0.0656495	0.0149574		IZU1	129	55	20	20	55	E2	4940
Fujisan	8	51	Izu-Bonin	35.3575	138.731	86000	29		6	3	0	0		0.648698	0.304839	0.037235	0.00922746		IZU1	129	55	20	20	55	E2	4940
Hachijojima	8	52	Izu-Bonin	33.1333	139.769	28000	18.91		7	2	0	0		0.722328	0.228896	0.041473	0.00730254		IZU1	129	55	20	20	55	E2	4940
Ioto	8	52	Izu-Bonin	24.7536	141.29	2800	7.71		1	0	0	0		0.665975	0.221287	0.0922949	0.0204434		IZU4	148	49	12	14	49	E2	6127
Izu-Oshima	8	52	Izu-Bonin	34.7214	139.398	23000	21.25		21	0	0	0		0.9259	0.0509157	0.0185239	0.00466031		IZU1	129	55	20	20	55	E2	4940
Izu-Tobu	8	51	Izu-Bonin	34.8997	139.098	142500	21.25		2	0	0	0		0.716915	0.18448	0.0793885	0.0192172		IZU1	129	55	20	20	55	E2	4940
Kozushima	8	52	Izu-Bonin	34.2161	139.156	31000	21.25		1	0	0	0		0.661889	0.222414	0.0933821	0.022315		IZU1	129	55	20	20	55	E2	4940
Mikurajima	8	52	Izu-Bonin	33.8711	139.605	6250	18.91		1	0	0	0		0.674607	0.212464	0.0883758	0.024553		IZU1	129	55	20	20	55	E2	4940
Miyakejima	8	52	Izu-Bonin	34.0786	139.529	8400	21.25		9	0	0	0		0.864213	0.0923929	0.0354542	0.00793992		IZU1	129	55	20	20	55	E2	4940
Myojinsho	8	52	Izu-Bonin	31.8833	139.917	3920	10.69		1	0	0	0		0.678283	0.211941	0.0944736	0.0153026		IZU2	135	51	23	24	51	E2	5349
Niijima	8	52	Izu-Bonin	34.3933	139.273	26000	21.25		3	0	0	0		0.75718	0.154573	0.0695142	0.0187328		IZU1	129	55	20	20	55	E2	4940
Galunggung	6	35	Java-Bali	-7.25	108.058	4645	32		1	2	0	0		0.491223	0.433439	0.0619154	0.0134228		JAVA6	78	57	14	14	57	0	3430
Krakatau	6	34	Java-Bali	-6.10167	105.423	1534	29.81		0	0	1	1		0.398877	0.195481	0.236365	0.169277		JAVA7	75	53	20	21	53	0	3133
Merapi	6	35	Java-Bali	-7.54167	110.442	3274	32		4	0	0	0		0.778328	0.145691	0.0607765	0.0152042		JAVA4	81	62	1	1	62	0	3998
Rinjani	6	36	Java-Bali	-8.41667	116.467	693	30.9		0	0	1	0		0.480473	0.209263	0.287561	0.0227028		JAVA1	84	66	12	10	66	0	4336
Tambora	6	36	Java-Bali	-8.25	118	43000	32		0	0	0	1		0.486407	0.206521	0.0960439	0.211029		JAVA1	84	66	12	10	66	0	4336
Tengger Caldera	6	35	Java-Bali	-7.94167	112.95	152000	32		1	0	0	0		0.658756	0.222543	0.0943244	0.0243765		JAVA3	82	64	2	2	64	0	4197
Avachinsky	10	55	Kamchatka-Kuriles	53.255	158.83	44700	40.67		6	6	1	0		0.491043	0.416656	0.0853816	0.00691943		KAM2	100	75	12	9	75	E1	5848
Bezymianny	10	55	Kamchatka-Kuriles	55.9783	160.587	2400	32.67		3	1	0	0		0.666603	0.259538	0.0565778	0.0172815		KAM1	100	74	13	10	74	E1	5899
Ilyinsky	10	55	Kamchatka-Kuriles	51.49	157.2	29887	30.09		1	1	0	0		0.560224	0.343233	0.081219	0.0153244		NKOUR2	110	77	12	9	77	C1	6149
Karymsky	10	55	Kamchatka-Kuriles	54.05	159.45	1290000	39.34		2	0	1	0		0.625368	0.162251	0.198104	0.0142758		KAM2	100	75	12	9	75	E1	5848
Khodutka	10	55	Kamchatka-Kuriles	52.0625	157.703	3000	34.67		0	2	0	0		0.393819	0.505515	0.082521	0.018145		NKOUR1	110	77	4	3	77	C1	6235
Kikhpinych	10	55	Kamchatka-Kuriles	54.4867	160.253	4730	34.34		2	0	0	0		0.712046	0.190741	0.0812075	0.0160052		KAM2	100	75	12	9	75	E1	5848
Kinenin	10	55	Kamchatka-Kuriles	57.35	160.967	1009	33.86		1	0	0	0		0.674398	0.21181	0.091201	0.0225907		KAM1	100	74	13	10	74	E1	5899
Kizimen	10	55	Kamchatka-Kuriles	55.13	160.317	10000	32.67		1	2	0	0		0.485845	0.432481	0.0666691	0.0150046		KAM2	100	75	12	9	75	E1	5848
Krasheninnikov	10	55	Kamchatka-Kuriles	54.5933	160.273	42410	34.34		3	0	0	0		0.755981	0.159929	0.0677172	0.0163728		KAM2	100	75	12	9	75	E1	5848
Ksudach	10	55	Kamchatka-Kuriles	51.8	157.533	160000	30.09		1	5	2	0		0.295204	0.493227	0.202099	0.00947006		NKOUR1	110	77	4	3	77	C1	6235
Kurile Lake	10	55	Kamchatka-Kuriles	51.45	157.117	46039	30.09		0	0	0	1		0.481468	0.214597	0.0969799	0.206955		NKOUR2	110	77	12	9	77	C1	6149
Maly Semiachik	10	55	Kamchatka-Kuriles	54.1333	159.667	27500	39.34		1	0	0	0		0.67307	0.214547	0.0903245	0.0220589		KAM2	100	75	12	9	75	E1	5848
Opala	10	55	Kamchatka-Kuriles	52.5433	157.335	44902	34.67		0	0	1	0		0.4874	0.216163	0.273534	0.0229026		NKOUR1	110	77	4	3	77	C1	6235
Sheveluch	10	55	Kamchatka-Kuriles	56.6533	161.36	32161	33		24	19	0	0		0.561547	0.425948	0.0103329	0.00217158		KAM1	100	74	13	10	74	E1	5899
Tao-Rusyr Caldera	9	54	Kamchatka-Kuriles	49.35	154.7	8290	27.38		0	0	0	1		0.468645	0.215508	0.0930933	0.222754		NKOUR3	110	79	6	4	79	C1	6105
Tolbachik	10	55	Kamchatka-Kuriles	55.83	160.33	10000	32.67		2	5	0	0		0.403997	0.546357	0.0379448	0.0117004		KAM2	100	75	12	9	75	E1	5848
Tolmachev Dol	10	55	Kamchatka-Kuriles	52.6333	157.583	5316	34.67		0	1	0	0		0.466298	0.421929	0.0884468	0.023326		NKOUR1	110	77	4	3	77	C1	6235
Ushishur	9	54	Kamchatka-Kuriles	47.5167	152.8	10622	18.38		1	0	0	0		0.669663	0.214339	0.0947736	0.0212244		NKOUR3	110	79	6	4	79	C1	6105
Ushkovsky	10	55	Kamchatka-Kuriles	56.0703	160.47	24014	33.65		1	0	0	0		0.671948	0.219251	0.087727	0.0210748		KAM1	100	74	13	10	74	E1	5899
Zavaritsky	10	55	Kamchatka-Kuriles	53.905	158.385	20000	40.67		1	0	0	0		0.673119	0.215675	0.0932611	0.0179455		KAM2	100	75	12	9	75	E1	5848
Zheltovsky	10	55	Kamchatka-Kuriles	51.5667	157.323	19909	30.09		0	1	0	0		0.488378	0.39683	0.0929943	0.0217978		NKOUR2	110	77	12	9	77	C1	6149
Macauley Island	4	18	Kermadec	-30.2	-178.467	7170	8.38		0	0	1	0		0.474975	0.210945	0.290697	0.023383		KER3	99	55	20	20	55	E2	4462
Raoul Island	4	18	Kermadec	-29.2667	-177.917	4296	11.22		8	0	1	0		0.794783	0.0876709	0.110062	0.00748466		KER4	101	59	15	14	59	E2	4714
Ceboruco	14	84	Mexico	21.125	-104.508	946	30		0	1	0	0		0.474497	0.412526	0.0900313	0.0229455		MEX1	8	40	14	20	40	E1	202
Chichinautzin	14	84	Mexico	19.0833	-99.1333	26264	45.65		1	0	0	0		0.656064	0.230006	0.0861436	0.0277869		MEX4	15	55	15	15	55	E1	NA
Colima	14	84	Mexico	19.5139	-103.617	4961	23		6	1	0	0		0.763125	0.187391	0.0391436	0.0103405		MEX2	8	47	1	1	47	E1	NA
Orizaba, Pico de	14	84	Mexico	19.03	-97.2681	10092	43.93		2	1	0	0		0.626994	0.297293	0.0594168	0.0162955		MEX5	15	60	17	16	60	E1	NA
Popocatépetl	14	84	Mexico	19.0233	-98.6222	16870	45.65		3	3	0	0		0.53643	0.40454	0.0473591	0.0116706		MEX4	15	55	15	15	55	E1	NA
Akita-Komagatake	8	51	Northeast-Japan	39.7583	140.803	13000	30		2	0	0	0		0.722568	0.182505	0.078645	0.0162817		JAP1	128	90	11	7	99	C3	4627
Hijiori	8	51	Northeast-Japan	38.6058	140.178	93000	28.33		0	1	0	0		0.463487	0.416707	0.0980968	0.0217089		JAP3	132	92	3	2	101	C3	5817
Hokkaido-Komagatake	8	53	Northeast-Japan	42.0608	140.681	36565	29.86		6	2	0	0		0.694204	0.259773	0.0371167	0.00890588		JAP1	128	90	11	7	99	C3	4627
Iwatesan	8	51	Northeast-Japan	39.8497	141.004	40000	26.64		1	1	0	0		0.57471	0.328385	0.0765826	0.0203221		JAP1	128	90	11	7	99	C3	4627
Shikotsu	8	53	Northeast-Japan	42.6881	141.38	60100	34.95		0	4	0	0		0.310872	0.619227	0.0575618	0.0123385		JAP1	128	90	11	7	99	C3	4627
Towada	8	51	Northeast-Japan	40.4667	140.917	110000	29.66		4	4	0	0		0.536751	0.417944	0.0359973	0.00930779		JAP1	128	90	11	7	99	C3	4627
Toya	8	53	Northeast-Japan	42.5414	140.843	105000	29.86		4	2	0	0		0.639249	0.305921	0.0461526	0.00867701		JAP1	128	90	11	7	99	C3	4627
Zaozan	8	51	Northeast-Japan	38.1406	140.443	47000	28.33		2	0	0	0		0.710978	0.182735	0.0828291	0.0234579		JAP3	132	92	3	2	101	C3	5817
Atacazo	15	91	Northern-Andes	-0.352778	-78.6169	9903	57.67		2	2	0	0		0.547134	0.386786	0.0535476	0.0125326		COL3	12	42	25	31	55	C3	302
Azufral	15	90	Northern-Andes	1.08333	-77.6833	3008	47.89		1	0	0	0		0.69476	0.196101	0.0892424	0.0198962		COL3	12	42	25	31	55	C3	302
Bravo, Cerro	15	90	Northern-Andes	5.09167	-75.3	7126	42		6	2	0	0		0.69072	0.259507	0.0404502	0.00932234		COL1	19	45	16	20	53	C3	587
Cayambe	15	91	Northern-Andes	0.0291667	-77.9858	910	44		3	0	0	0		0.753081	0.165269	0.0655762	0.0160731		COL3	12	42	25	31	55	C3	302
Chachimbiro	15	91	Northern-Andes	0.468056	-78.2872	5525	50.5		1	0	0	0		0.663046	0.219926	0.0924129	0.024615		COL3	12	42	25	31	55	C3	302
Cotopaxi	15	91	Northern-Andes	-0.677222	-78.4361	490000	57.67		18	7	0	0		0.690936	0.287093	0.0175073	0.00446379		COL3	12	42	25	31	55	C3	302
Cuicocha	15	91	Northern-Andes	0.308333	-78.3639	3273	50.5		0	1	0	0		0.479376	0.402559	0.0956801	0.0223844		COL3	12	42	25	31	55	C3	302
Doña Juana	15	90	Northern-Andes	1.46667	-76.9167	5152	44		2	0	0	0		0.721739	0.180462	0.082966	0.0148324		COL2	15	47	32	34	50	C3	450
Galeras	15	90	Northern-Andes	1.21667	-77.3667	560000	47.89		1	1	0	0		0.556576	0.347035	0.077588	0.0188012		COL3	12	42	25	31	55	C3	302
Guagua Pichincha	15	91	Northern-Andes	-0.170833	-78.5983	1880	57.67		3	0	0	0		0.764287	0.160156	0.0613409	0.0142162		COL3	12	42	25	31	55	C3	302
Pululagua	15	91	Northern-Andes	0.0383333	-78.4633	2709	50.5		0	1	1	0		0.401004	0.34181	0.238699	0.0184864		COL3	12	42	25	31	55	C3	302
Quilotoa	15	91	Northern-Andes	-0.85	-78.9	38905	57.67		0	0	1	0		0.490872	0.216859	0.268777	0.0234916		COL3	12	42	25	31	55	C3	302
Romeral	15	90	Northern-Andes	5.20583	-75.3642	8822	42		1	0	0	0		0.672418	0.210891	0.0923727	0.0243181		COL1	19	45	16	20	53	C3	587
Ruiz, Nevado del	15	90	Northern-Andes	4.89528	-75.3225	900000	49.12		3	1	0	0		0.663819	0.262279	0.057848	0.0160536		COL1	19	45	16	20	53	C3	587
Soche	15	91	Northern-Andes	0.552222	-77.5797	11016	44		0	1	0	0		0.479816	0.405288	0.0995318	0.015364		COL3	12	42	25	31	55	C3	302
Tolima, Nevado del	15	90	Northern-Andes	4.66667	-75.3333	580000	49.12		0	2	0	0		0.409043	0.490343	0.0807371	0.0198773		COL1	19	45	16	20	53	C3	587
Tungurahua	15	91	Northern-Andes	-1.46694	-78.4417	11151	48.99		4	1	0	0		0.707069	0.228172	0.0519159	0.0128422		COL3	12	42	25	31	55	C3	302
Pinatubo	7	46	Northern-Philippines	15.1333	120.35	40290	32		0	1	4	0		0.29155	0.23186	0.466242	0.0103476		LUZ3	18	71	2	2	93	C3	1017
Taal	7	46	Northern-Philippines	14.0017	120.993	6284	29.84		4	0	1	0		0.706958	0.119913	0.161979	0.0111505		LUZ4	22	41	29	35	65	C3	753
Aira	8	50	Ryuku	31.585	130.657	850000	30		8	4	0	0		0.650872	0.313811	0.0276599	0.00765692		RYUN4	50	73	22	17	48	E2	2772
Asosan	8	50	Ryuku	32.8808	131.106	273400	35.64		5	4	0	0		0.572634	0.380943	0.0370233	0.00939991		NAN3	17	48	23	26	48	C1	135
Ata	8	50	Ryuku	31.2167	130.567	240000	30		20	1	0	0		0.890677	0.0870963	0.0171034	0.00512294		RYUN4	50	73	22	17	48	E2	2772
Kikai	8	50	Ryuku	30.7894	130.308	400000	27.79		0	0	0	1		0.481566	0.213272	0.0889646	0.216197		RYUN4	50	73	22	17	48	E2	2772
Kirishimayama	8	50	Ryuku	31.9308	130.864	60000	30		4	3	0	0		0.574347	0.376274	0.0389873	0.0103919		RYUN4	50	73	22	17	48	E2	2772
Kuchinoerabujima	8	50	Ryuku	30.4397	130.219	15000	27.79		1	0	0	0		0.669475	0.223632	0.0836836	0.023209		RYUN4	50	73	22	17	48	E2	2772
Kujusan	8	50	Ryuku	33.0825	131.251	57000	40.67		5	0	0	0		0.811721	0.119157	0.0534613	0.015661		NAN3	17	48	23	26	48	C1	135
Sanbesan	8	51	Ryuku	35.1333	132.617	103000	35.42		0	1	0	0		0.471297	0.417301	0.0896039	0.0217986		NAN3	17	48	23	26	48	C1	135
Yufu-Tsurumi	8	50	Ryuku	33.2833	131.432	615000	40.67		1	0	0	0		0.675976	0.213256	0.0883615	0.0224062		NAN3	17	48	23	26	48	C1	135
Antillanca Group	15	96	Southern-Andes	-40.7708	-72.1533	2910	35		0	2	0	0		0.420262	0.496014	0.0663329	0.0173904		SCHI5	20	75	24	18	75	C1	NA
Callaqui	15	96	Southern-Andes	-37.9167	-71.45	2450	47.08		1	0	0	0		0.6729	0.209238	0.0941452	0.023717		SCHI3	35	72	35	26	72	C1	NA
Cayutué-La Viguería	15	97	Southern-Andes	-41.25	-72.2667	1995	36		1	0	0	0		0.662343	0.212373	0.0975336	0.0277503		SCHI5	20	75	24	18	75	C1	NA
Chaitén	15	97	Southern-Andes	-42.8328	-72.6458	9700	37		1	1	0	0		0.568916	0.332181	0.0799701	0.018932		TRI1	12	76	20	15	76	0	NA
Corcovado	15	97	Southern-Andes	-43.1833	-72.8	9590	36		2	1	0	0		0.625029	0.290442	0.0714963	0.0130333		TRI1	12	76	20	15	76	0	NA
Hudson, Cerro	15	97	Southern-Andes	-45.9	-72.9667	110000	37		0	1	2	0		0.358883	0.292568	0.333751	0.0147986		TRI2	5	75	20	15	75	0	NA
Llaima	15	96	Southern-Andes	-38.6917	-71.7286	15991	42.92		2	0	0	0		0.719413	0.186883	0.0759945	0.0177093		SCHI3	35	72	35	26	72	C1	NA
Maca	15	97	Southern-Andes	-45.1	-73.1667	1400	34		0	1	0	0		0.470055	0.408842	0.102618	0.0184855		TRI2	5	75	20	15	75	0	NA
Melimoyu	15	97	Southern-Andes	-44.0833	-72.8833	2770	36		2	0	0	0		0.714463	0.185748	0.0774642	0.0223251		TRI1	12	76	20	15	76	0	NA
Mentolat	15	97	Southern-Andes	-44.7	-73.0833	7530	30		0	1	0	0		0.482835	0.39999	0.0965106	0.0206643		TRI1	12	76	20	15	76	0	NA
Minchinmávida	15	97	Southern-Andes	-42.7931	-72.4386	10380	37		2	0	1	0		0.633004	0.147303	0.203928	0.0157651		TRI1	12	76	20	15	76	0	NA
Mocho-Choshuenco	15	96	Southern-Andes	-39.9275	-72.0269	10300	34		0	1	0	0		0.47946	0.409541	0.0852995	0.0256995		SCHI4	33	75	27	20	75	C1	NA
Osorno	15	97	Southern-Andes	-41.1	-72.4931	1403	36		1	0	0	0		0.683425	0.203899	0.0921172	0.0205584		SCHI5	20	75	24	18	75	C1	NA
Puyehue-Cordón Caulle	15	96	Southern-Andes	-40.5903	-72.1172	121000	35		0	2	0	0		0.399755	0.498235	0.0838812	0.0181289		SCHI5	20	75	24	18	75	C1	NA
Sollipulli	15	96	Southern-Andes	-38.9667	-71.5167	2927	42.92		0	1	0	0		0.489063	0.402692	0.086706	0.0215391		SCHI4	33	75	27	20	75	C1	NA
Villarrica	15	96	Southern-Andes	-39.4167	-71.9333	95000	39.17		3	1	0	0		0.670116	0.25932	0.0581066	0.0124573		SCHI4	33	75	27	20	75	C1	NA
Yanteles	15	97	Southern-Andes	-43.5	-72.8	10364	36		1	0	0	0		0.660616	0.224878	0.0914011	0.0231048		TRI1	12	76	20	15	76	0	NA
Aniakchak	11	63	Western-Alaska	56.8833	-158.167	7200	32		2	0	2	0		0.549785	0.144328	0.295392	0.0104948		W_ALA3	52	59	9	9	59	0	1381
Black Peak	11	63	Western-Alaska	56.5525	-158.785	3850	32		0	0	1	0		0.458872	0.219844	0.295228	0.0260561		W_ALA2	52	60	12	11	60	0	1961
Dana	11	63	Western-Alaska	55.6411	-161.214	4243	34		0	1	0	0		0.483056	0.394023	0.0932541	0.0296674		W_ALA1	52	62	14	13	62	0	1706
Kaguyak	11	63	Western-Alaska	58.6083	-154.028	6730	32.84		0	0	1	0		0.477859	0.222247	0.280424	0.0194702		W_ALA5	49	58	6	6	58	0	1495
Veniaminof	11	63	Western-Alaska	56.1667	-159.383	4131	32		0	0	1	0		0.479483	0.228553	0.271337	0.0206261		W_ALA2	52	60	12	11	60	0	1961
Yantarni	11	63	Western-Alaska	57.0186	-157.185	2750	32		0	1	0	0		0.462733	0.419613	0.0939225	0.0237318		W_ALA3	52	59	9	9	59	0	1381
References:
1: Laske et al., 2013
2: Brown et al., 2014
3: Sheldrake & Caricchi, 2017
4: Lallemand et al., 2005

## Sheet: A2. Regions
Arc number	Arc name	λ*	Sn* (mm yr-1)	Sp* (mm yr-1)	O* (°)	Qs*	A* (Ma)	Z* (km)	Caldera density (per 1000 km)1	H	α = 1/λ
i	Antilles	0.22 [0.14]	8 [2]	7 [3]	39 [21]	0.56 [0.21]	89 [7]	20.8 [2.2]	2.9	2.3	2.3
ii	Cascades	0.41 [0.05]	27 [6]	9 [2]	19 [8]	0.74 [0.09]	11 [1]	39.8 [3]	2.6	1.9	1.9
iii	Central-Aleutians	0.36 [0.2]	54 [10]	44 [12]	39 [13]	0.55 [0.12]	59 [4]	20.9 [3]	1.7	2.2	2.2
iv	Central-America	0.36 [0.05]	78 [6]	3 [3]	3 [2]	0.96 [0.04]	26 [2]	29 [7.9]	11	3.1	3.1
v	Central-Andes	0.39 [0.08]	66 [4]	25 [3]	21 [2]	0.73 [0.02]	54 [1]	54.7 [9.3]	1.9	2.7	2.7
vi	Eastern-Aleutians	0.56 [0.06]	64 [2]	13 [1]	11 [1]	0.83 [0.01]	56 [3]	27.6 [1.9]	1.5	3.2	3.2
vii	Hoikkaido-Kuriles	0.4 [0.09]	77 [0]	28 [1]	21 [1]	0.73 [0.01]	126 [4]	28.2 [3.7]	14.1	3.2	3.2
viii	Honshu	0.33 [0.03]	93 [0]	2 [0]	1 [0]	0.98 [0]	127 [0]	31.3 [1.3]	-	4.69	4.69
ix	Izu-Bonin	0.27 [0.05]	54 [2]	20 [3]	20 [2]	0.74 [0.03]	131 [6]	19.1 [5.7]	3.3	3.2	3.2
x	Java-Bali	0.48 [0.12]	61 [5]	10 [7]	10 [8]	0.86 [0.1]	81 [4]	31.5 [0.9]	3.3	3.6	3.6
xi	Kamchatka-Kuriles	0.43 [0.03]	76 [2]	10 [4]	8 [3]	0.88 [0.04]	104 [5]	33.2 [4.9]	9.6	3.9	3.9
xii	Mexico	0.36 [0.08]	51 [8]	12 [6]	13 [7]	0.81 [0.09]	12 [4]	37.6 [10.5]	2.1	2.1	2.1
xiii	Northeast-Japan	0.38 [0.05]	91 [1]	9 [4]	6 [2]	0.91 [0.04]	129 [2]	29.7 [2.4]	18.3	4.2	4.2
xiv	Northern-Andes	0.37 [0.03]	43 [2]	23 [4]	29 [5]	0.65 [0.05]	14 [3]	49.5 [5.5]	3.3	1.9	1.9
xv	Ryuku	0.33 [0.07]	62 [13]	22 [1]	21 [5]	0.73 [0.05]	35 [17]	33.1 [5.1]	8.6	2.5	2.5
xvi	Southern-Andes	0.41 [0.03]	75 [1]	24 [5]	18 [4]	0.76 [0.04]	19 [11]	37.1 [4]	6.9	2.3	2.3
xvii	Western-Alaska	0.54 [0.03]	60 [1]	10 [3]	10 [2]	0.85 [0.03]	52 [1]	32.5 [0.8]	2.8	3.2	3.2
1Hughes & Mahood, 2008
* 1 standard deviation is reported in square brackets
